# Supplementary material
Source: PubMed Central journal article supplement (PMC7364273)
Supplement: ajcd0010-0028-f5.pdf [file ajcd0010-0028-f5.pdf]

## Acute cardiac injury in COVID-19

**Supplementary Table 1.** Quality assessment of the studies

| Study (First author/publication year) | Quality assessment score |
|---------------------------------------|--------------------------|
| Huang et al, 2020                     | Fair                     |
| He et al, 2020                        | Fair                     |
| Wang et al, 2020                      | Fair                     |
| Zhou et al, 2020                      | Fair                     |
| Yang et al, 2020                      | Fair                     |
| Ruan et al, 2020                      | Fair                     |
| Shi et al, 2020                       | Good                     |
| Guo et al, 2020                       | Fair                     |
